# Supplementary material for: Phospho-KNL-1 recognition by a TPR domain targets the BUB-1–BUB-3 complex to C. elegans kinetochores
Source: PubMed Central journal article supplement — J Cell Biol. 2024 Apr 5;223(7):e202402036. doi: 10.1083/jcb.202402036 (PMC10996584; doi:10.1083/jcb.202402036), 2024-04-05
Supplement: JCB_202402036_review_history.pdf [file JCB_202402036_review_history.pdf]

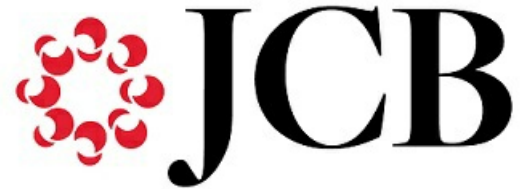

# Phospho-KNL-1 recognition by a TPR domain targets the BUB-1-BUB-3 complex to *C. elegans* kinetochores

Jack Houston, Clemence Vissotsky, Amar Deep, Hiroyuki Hakozi, Enice Crews, Karen Oegema, Kevin Corbett, Pablo Lara-Gonzalez, Taekyung Kim, and Arshad Desai

*Corresponding Author(s): Arshad Desai, University of California, San Diego and Taekyung Kim, Pusan National University*

---

|                         |                     |            |
|-------------------------|---------------------|------------|
| <b>Review Timeline:</b> | Submission Date:    | 2024-02-05 |
|                         | Editorial Decision: | 2024-03-08 |
|                         | Revision Received:  | 2024-03-21 |

---

*Monitoring Editor: Aaron Straight*

*Scientific Editor: Andrea Marat*

## Transaction Report:

(Note: With the exception of the correction of typographical or spelling errors that could be a source of ambiguity, letters and reports are not edited. The original formatting of letters and referee reports may not be reflected in this compilation.)

**DOI:** <https://doi.org/10.1083/jcb.202402036>

March 8, 2024

RE: JCB Manuscript #202402036

Dr. Arshad Desai  
University of California, San Diego  
Cell & Developmental Biology AND Cellular & Molecular Medicine  
9500 Gilman Dr  
9500 Gilman Drive  
La Jolla, CA 92093

Dear Dr. Desai:

Thank you for submitting your manuscript entitled "Phospho-KNL-1 recognition by a TPR domain targets the BUB-1-BUB-3 complex to *C. elegans* kinetochores". Your study has been assessed by three expert reviewers whose comments are appended below. Based on their feedback we would be happy to publish your paper in JCB pending final revisions necessary to meet our formatting guidelines (see details below) along with a response to their minor comments.

As you will see, the reviewers are all very positive about the significance and quality of your study. Please respond to all of their comments in your final version with text revisions as appropriate. While we would welcome new data and can provide additional time if you would like to conduct any suggested experiments, this is not necessary.

To avoid unnecessary delays in the acceptance and publication of your paper, please read the following information carefully.

#### A. MANUSCRIPT ORGANIZATION AND FORMATTING:

Full guidelines are available on our Instructions for Authors page, <https://jcb.rupress.org/submission-guidelines#revised>.

**\*\*Submission of a paper that does not conform to JCB guidelines will delay the acceptance of your manuscript.\*\***

1) Text limits: Character count for Articles is < 40,000, not including spaces. Count includes abstract, introduction, results, discussion, and acknowledgments. Count does not include title page, figure legends, materials and methods, references, tables, or supplemental legends.

2) Figures limits: Articles may have up to 10 main text figures.

3) Figure formatting: Scale bars must be present on all microscopy images, including inset magnifications. Molecular weight or nucleic acid size markers must be included on all gel electrophoresis.

4) Statistical analysis: Error bars on graphic representations of numerical data must be clearly described in the figure legend. The number of independent data points (n) represented in a graph must be indicated in the legend. Statistical methods should be explained in full in the materials and methods. For figures presenting pooled data the statistical measure should be defined in the figure legends. Please also be sure to indicate the statistical tests used in each of your experiments (either in the figure legend itself or in a separate methods section) as well as the parameters of the test (for example, if you ran a t-test, please indicate if it was one- or two-sided, etc.). Also, if you used parametric tests, please indicate if the data distribution was tested for normality (and if so, how). If not, you must state something to the effect that "Data distribution was assumed to be normal but this was not formally tested."

5) Abstract and title: The abstract should be no longer than 160 words and should communicate the significance of the paper for a general audience. The title should be less than 100 characters including spaces. Make the title concise but accessible to a general readership.

\* We typically do not allow for the inclusion of species name in the title unless absolutely essential.

6) Materials and methods: Should be comprehensive and not simply reference a previous publication for details on how an experiment was performed. Please provide full descriptions in the text for readers who may not have access to referenced manuscripts.

7) \* All antibodies, cell lines, animals, and tools used in the manuscript should be described in full, including accession numbers for materials available in a public repository such as the Resource Identification Portal. Please be sure to provide the sequences for all of your primers/oligos and RNAi constructs in the materials and methods. You must also indicate in the methods the source, species, and catalog numbers (where appropriate) for all of your antibodies. Please also indicate the acquisition and

quantification methods for immunoblotting/western blots. \*

8) Microscope image acquisition: The following information must be provided about the acquisition and processing of images:

- a. Make and model of microscope
- b. Type, magnification, and numerical aperture of the objective lenses
- c. Temperature
- d. Imaging medium
- e. Fluorochromes
- f. Camera make and model
- g. Acquisition software
- h. Any software used for image processing subsequent to data acquisition. Please include details and types of operations involved (e.g., type of deconvolution, 3D reconstitutions, surface or volume rendering, gamma adjustments, etc.).

9) References: There is no limit to the number of references cited in a manuscript. References should be cited parenthetically in the text by author and year of publication. Abbreviate the names of journals according to PubMed.

10) Supplemental materials: There are strict limits on the allowable amount of supplemental data. Articles may have up to 5 supplemental figures. Please also note that tables, like figures, should be provided as individual, editable files. A summary of all supplemental material should appear at the end of the Materials and methods section.

11) eTOC summary: A ~40-50-word summary that describes the context and significance of the findings for a general readership should be included on the title page. The statement should be written in the present tense and refer to the work in the third person.

12) Conflict of interest statement: JCB requires inclusion of a statement in the acknowledgements regarding competing financial interests. If no competing financial interests exist, please include the following statement: "The authors declare no competing financial interests." If competing interests are declared, please follow your statement of these competing interests with the following statement: "The authors declare no further competing financial interests."

13) ORCID IDs: ORCID IDs are unique identifiers allowing researchers to create a record of their various scholarly contributions in a single place. Please note that ORCID IDs are now \*required\* for all authors. At resubmission of your final files, please be sure to provide your ORCID ID and those of all co-authors.

14) A separate author contribution section following the Acknowledgments. All authors should be mentioned and designated by their full names. We encourage use of the CRediT nomenclature.

Please note that JCB now requires authors to submit Source Data used to generate figures containing gels and Western blots with all revised manuscripts. This Source Data consists of fully uncropped and unprocessed images for each gel/blot displayed in the main and supplemental figures. Since your paper includes cropped gel and/or blot images, please be sure to provide one Source Data file for each figure that contains gels and/or blots along with your revised manuscript files. File names for Source Data figures should be alphanumeric without any spaces or special characters (i.e., SourceDataF#, where F# refers to the associated main figure number or SourceDataFS# for those associated with Supplementary figures). The lanes of the gels/blots should be labeled as they are in the associated figure, the place where cropping was applied should be marked (with a box), and molecular weight/size standards should be labeled wherever possible.

Source Data files will be made available to reviewers during evaluation of revised manuscripts and, if your paper is eventually published in JCB, the files will be directly linked to specific figures in the published article.

Source Data Figures should be provided as individual PDF files (one file per figure). Authors should endeavor to retain a minimum resolution of 300 dpi or pixels per inch. Please review our instructions for export from Photoshop, Illustrator, and PowerPoint here: <https://rupress.org/jcb/pages/submission-guidelines#revised>

Journal of Cell Biology now requires a data availability statement for all research article submissions. These statements will be published in the article directly above the Acknowledgments. The statement should address all data underlying the research presented in the manuscript. Please visit the JCB instructions for authors for guidelines and examples of statements at (<https://rupress.org/jcb/pages/editorial-policies#data-availability-statement>).

## B. FINAL FILES:

Please upload the following materials to our online submission system. These items are required prior to acceptance. If you have any questions, contact JCB's Managing Editor, Lindsey Hollander ([lhollander@rockefeller.edu](mailto:lhollander@rockefeller.edu)).

-- An editable version of the final text (.DOC or .DOCX) is needed for copyediting (no PDFs).

-- High-resolution figure and MP4 video files: See our detailed guidelines for preparing your production-ready images,

<https://jcb.rupress.org/fig-vid-guidelines>.

-- Cover images: If you have any striking images related to this story, we would be happy to consider them for inclusion on the journal cover. Submitted images may also be chosen for highlighting on the journal table of contents or JCB homepage carousel. Images should be uploaded as TIFF or EPS files and must be at least 300 dpi resolution.

\*\*It is JCB policy that if requested, original data images must be made available to the editors. Failure to provide original images upon request will result in unavoidable delays in publication. Please ensure that you have access to all original data images prior to final submission.\*\*

\*\*The license to publish form must be signed before your manuscript can be sent to production. A link to the electronic license to publish form will be sent to the corresponding author only. Please take a moment to check your funder requirements before choosing the appropriate license.\*\*

Additionally, JCB encourages authors to submit a short video summary of their work. These videos are intended to convey the main messages of the study to a non-specialist, scientific audience. Think of them as an extended version of your abstract, or a short poster presentation. We encourage first authors to present the results to increase their visibility. The videos will be shared on social media to promote your work. For more detailed guidelines and tips on preparing your video, please visit <https://rupress.org/jcb/pages/submission-guidelines#videoSummaries>.

Thank you for your attention to these final processing requirements. Please revise and format the manuscript and upload materials within 7 days. If you need an extension for whatever reason, please let us know and we can work with you to determine a suitable revision period.

Please contact the journal office with any questions at [cellbio@rockefeller.edu](mailto:cellbio@rockefeller.edu).

Thank you for this interesting contribution, we look forward to publishing your paper in Journal of Cell Biology.

Sincerely,

Aaron Straight  
Monitoring Editor

Andrea L. Marat  
Senior Scientific Editor

Journal of Cell Biology

-----  
Reviewer #1 (Comments to the Authors (Required)):

This interesting manuscript by Houston and colleagues focuses on the role of the tetratricopeptide repeat (TPR) domain in the localization of BUB-1, a kinase involved in the spindle assembly checkpoint, in biorientation, and in the protection of sister chromatid cohesion.

The authors find that the BUB-1 TPR recognizes a phosphorylated motif in KNL-1, a kinetochore scaffold protein, and is essential for kinetochore localization of the BUB-1-BUB-3 complex. This finding is interesting and novel, because the current model of recruitment of BUB1 to kinetochores in various model systems emphasizes a crucial role of its tightly bound phospho-aminoacid adaptor BUB3, which is known to bind different phosphorylated motifs known as MELT. The KNL-1 motifs additionally characterized here, the TF motifs, are substrates of PLK-1 (like the MELT motifs), and the authors demonstrate that a 2-point high-affinity interaction engaging at the same time the BUB-1 TPR domain and BUB-3 on KNL-1 is required for super-stoichiometric recruitment of BUB-1 to kinetochores.

Understanding the kinetochore recruitment mechanism of BUB-1 and of other kinetochore regulators is very important for their functional dissection. By revealing a significantly more nuanced view of the mechanism of kinetochore recruitment of BUB-1 in *C. elegans*, an established model system for cell division, this study explains why loss of BUB-1 is more severe than loss of BUB-3. The experiments are technically excellent and nicely controlled (e.g. panels 1C-D). The conclusions are persuasive, the illustrations very clear, and the text accessible and logical. Overall, I consider this manuscript a very strong candidate for the JCB and recommend its publication essentially in its present form.

Minor points:

Figure 3B, the direction of the 90° rotation is opposite to the one indicated

Reviewer #2 (Comments to the Authors (Required)):

In this study, Houston et al. have identified the N-terminal TPR domain is the primary kinetochore targeting motif in *C.elegans* BUB1. This is in contrast to the prevailing dogma that BUB3 directs BUB1 to kinetochores through binding phosphorylated MELT motifs. The authors used AlfaFold to identify a motif on KNL1 that binds the TPR and show that this depends on PLK1 phosphorylation and is necessary for proper chromosome segregation. This finding could have broader implications because the TPR motif in BUB1 is highly conserved.

As expected from the Desai lab, this is a very solid piece of work. The data are admirably clear and convincing and all the appropriate controls are included. I recommend publication as the paper stands.

Reviewer #3 (Comments to the Authors (Required)):

This manuscript reports a very interesting study of how the Bub1 TPR domain interacts directly with phosphorylated TF motifs in the kinetochore protein KNL1, in nematode worms. These motifs are interspersed with, but distinct from, the well known MELT motifs in KNL1 that are bound by Bub3.

Whilst these TF motifs may not be very widely conserved, beyond nematodes, they do provide an interesting mechanism for TPR domain function and phosphoreader function. As a consequence, this mechanism will be of interest far beyond the kinetochore/mitosis/checkpoint signalling communities.

The data are excellent and extremely clearly presented and the paper is very well written. I have only minor comments to be addressed:

1) Fig 2E. It is not clear why the *C.elegans* Bub1 TPR should interact with a novel motif in the same way as human Bub1 interacts with the KI motif. The mutations made have a clear impact and phenotype, but might that not be true of many other mutations made in the TPR fold?

2) Fig 2G. Where do these mutant Bub1 proteins localize?

3) Fig 3B: why alphafold 'multimer' - isn't this simply a 1:1 complex?

4) I find the phrase super-stoichiometric somewhat confusing here (page 9-10). Could it be that (on average) only one molecule of Bub1 binds directly via the KNL1 TF motifs and the other 4 via Bub3-MELTs on each molecule of KNL1? If so, why are there 6 TF motifs? Is one more important than the others?

The authors model in 5D is quite different to this, with a single Bub1 molecule interacting with both TF (directly) and MELT (indirectly via Bub3) motifs. Can they provide direct biophysical evidence for this higher affinity interaction?

Related to their proposed mechanism: do we know how many of the TF and MELT motifs get phosphorylated by Plk1 in a single molecule of KNL1? From mass-spec analysis of intact KNL1 molecules.

5) Discussion: the authors propose that T motifs in human KNL1 may carry out a similar function to the nematode TF motifs: can they provide any evidence for this? Has anybody mutated these motifs and reported a phenotype?

**Reviewer #3:**

This manuscript reports a very interesting study of how the Bub1 TPR domain interacts directly with phosphorylated TF motifs in the kinetochore protein KNL1, in nematode worms. These motifs are interspersed with, but distinct from, the well known MELT motifs in KNL1 that are bound by Bub3.

Whilst these TF motifs may not be very widely conserved, beyond nematodes, they do provide an interesting mechanism for TPR domain function and phosphoreader function. As a consequence, this mechanism will be of interest far beyond the kinetochore/mitosis/checkpoint signalling communities.

The data are excellent and extremely clearly presented and the paper is very well written. I have only minor comments to be addressed:

1) Fig 2E. It is not clear why the *C.elegans* Bub1 TPR should interact with a novel motif in the same way as human Bub1 interacts with the KI motif. The mutations made have a clear impact and phenotype, but might that not be true of many other mutations made in the TPR fold?

We designed the BUB-1 TPR mutants prior to the introduction of AlphaFold and based them on comparing a structural model of the *C. elegans* TPR to the structure of the human Bub1 TPR-K11 complex. Given the results with the  $\Delta$ TPR and TPR-only fragments, we endeavored to design mutants on the convex surface of the TPR (M72R and R48A;K80A) that potentially disrupted an interaction analogous to the Bub1-K11 interaction in human cells. We additionally generated and screened E63A, R67A and K99A mutants on the concave TPR surface. Only the 2 mutants on the convex surface disrupted BUB-1 localization. As AlphaFold modeling, conducted after we obtained results with the TPR mutants, revealed an interface similar to the Bub1-K11 motif interface on the convex surface of the TPR, we did not analyze the concave surface mutants in sufficient depth to include in the manuscript. Instead, we focused on analyzing the interface from the KNL-1 side, by conducting parallel in vivo and biochemical analysis of the TF motifs.

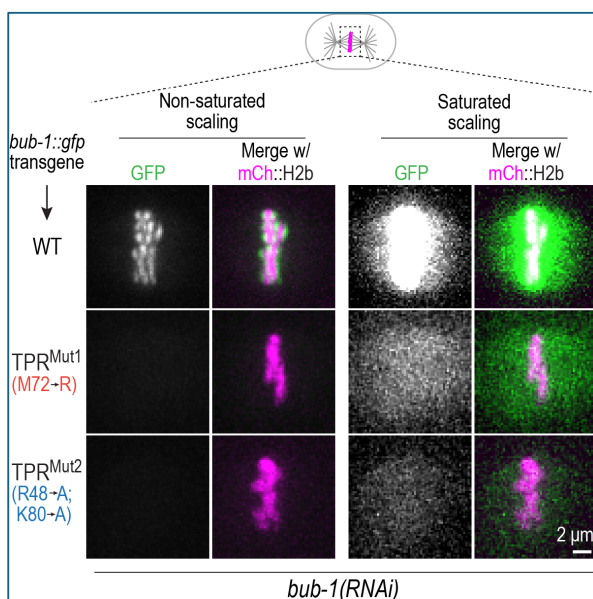

2) Fig 2G. Where do these mutant Bub1 proteins localize?

The BUB-1 mutants do not exhibit chromosomal localization but are weakly enriched in the nuclear/spindle region (see images to the left).

3) Fig 3B: why alphafold 'multimer' - isn't this simply a 1:1 complex?

The term was based on the name for the implementation of AlphaFold used to generate models of protein complexes, instead of single polypeptide chains (<https://doi.org/10.1101/2021.10.04.463034>). To avoid confusion, we have removed "multimer" from the label.

4) I find the phrase super-stoichiometric somewhat confusing here (page 9-10). Could it be that (on average) only one molecule of Bub1 binds directly via the KNL1 TF motifs and the other 4 via Bub3-MELTs on each molecule of KNL1?

Our analysis of the TPR mutants in the presence of endogenous BUB-1 indicated that these mutants, which do not alter the BUB-3 binding interface, nonetheless fail to localize (**Fig. S1E**). This observation excludes the possibility raised by the reviewer and indicates that TPR engagement of each individual BUB-1 molecule with a TF motif on KNL-1 is required for localization. This conclusion is consistent with BUB-3 not localizing significantly when the BUB-1 TPR was unable to engage with the KNL-1 TF motifs (**Fig. 4A**).

If so, why are there 6 TF motifs? Is one more important than the others?

In light of the requirement of TPR domain engagement with a TF motif for individual BUB-1 molecule localization (*see response to first set of comments in point 4 above*), our data quantifying *in situ* GFP-tagged proteins suggest that ~5 of the TF motifs in each KNL-1 molecule must engage BUB-1–BUB-3 complexes. In terms of importance, we have previously shown that partial truncations of the KNL-1 N-terminus that remove different sets of TF motifs exhibited partial BUB-1 localization (PMID: 24567362). These data, interpreted in light of what we elucidate in the current manuscript, indicate that there may be a greater contribution of TF motifs 4,5 & 6 to BUB-1 localization. However, we would need to repeat these analysis with the significantly better probes (such as *in situ*-tagged GFP::BUB-1) and believe this is best done in future work that combines such an effort with mutation of individual TF motifs.

The authors model in 5D is quite different to this, with a single Bub1 molecule interacting with both TF (directly) and MELT (indirectly via Bub3) motifs. Can they provide direct biophysical evidence for this higher affinity interaction?

The model is based on three pieces of data: TPR interaction with a TF motif is required for each BUB-1 molecule to localize (*see response to first set of comments in point 4 above*), mutating BUB-3's ability to recognize pMELT motifs prevents the rapid increase in localization, and preventing PLK-1 docking on BUB-1 prevents the rapid increase in localization. These observations are best reconciled by the model that is depicted in which a TF motif is phosphorylated by a PLK-1 pool distinct from BUB-1-bound PLK-1 that, via the TPR interface, brings BUB-1-associated PLK-1 activity to drive phosphorylation of MELT and possibly other TF motifs. Engagement of BUB-3 with the pMELT motif leads to a higher affinity bound state that enables rapid increase as each TF motif + MELT motif recruits a BUB-1-BUB-3 complex.

We do not currently have the tools (a reconstituted *C. elegans* BUB-1–BUB-3 complex) to test the two-point interaction biochemically but note that this has been shown for human Bub1-Bub3 engagement with KI and pMELT motifs (*see Fig. 2E* of PMID: 24361068).

Related to their proposed mechanism: do we know how many of the TF and MELT motifs get phosphorylated by Plk1 in a single molecule of KNL1? From mass-spec analysis of intact KNL1 molecules.

We have conducted proteolysis-based mass spec and detected phosphorylation of 4 TF motifs (*see Fig. S3E*). Unfortunately, a major challenge with mass spec analysis of KNL-1 is the absence / failure to detect a large part of the phosphorylated protein. We suspect this is because it is heavily phosphorylated by PLK-1 (*see the shift in electrophoretic mobility in Fig. 3F*

& G). We additionally show mutation of the threonine in TF motifs to nonphosphorylatable alanines enhanced electrophoretic mobility following PLK-1 phosphorylation (*Fig. 3G*), which is evidence for phosphorylation of these residues.

5) Discussion: the authors propose that T $\Omega$  motifs in human KNL1 may carry out a similar function to the nematode TF motifs: can they provide any evidence for this? Has anybody mutated these motifs and reported a phenotype?

In the context of the 3-MELT repeat fragment of human Knl1 analyzed by Vluegel et al. (PMID: 25661489), no mutation of the hydrophobic residue of the T $\Omega$  was analyzed. They did mutate the T and an S that follows the hydrophobic residue to alanines and showed that, when monitoring kinetochore localization, these alanine mutations enhanced mutation of the "SHT" motif immediately C-terminal to the MELTs that is recognized by human Bub3. As the SHT mutant by itself significantly compromised checkpoint signaling, no functional analysis of the T $\Omega$  motifs was conducted and, to our knowledge, has not been pursued in subsequent work.
