# Supplementary material for: Phospho-KNL-1 recognition by a TPR domain targets the BUB-1–BUB-3 complex to C. elegans kinetochores
Source: PubMed Central journal article supplement — J Cell Biol. 2024 Apr 5;223(7):e202402036. doi: 10.1083/jcb.202402036 (PMC10996584; doi:10.1083/jcb.202402036), 2024-04-05

# SourceDataF2

2B: Anti-GFP blot, uncropped, box indicates approximate cropped area, lanes marked, molecular weight markers labeled

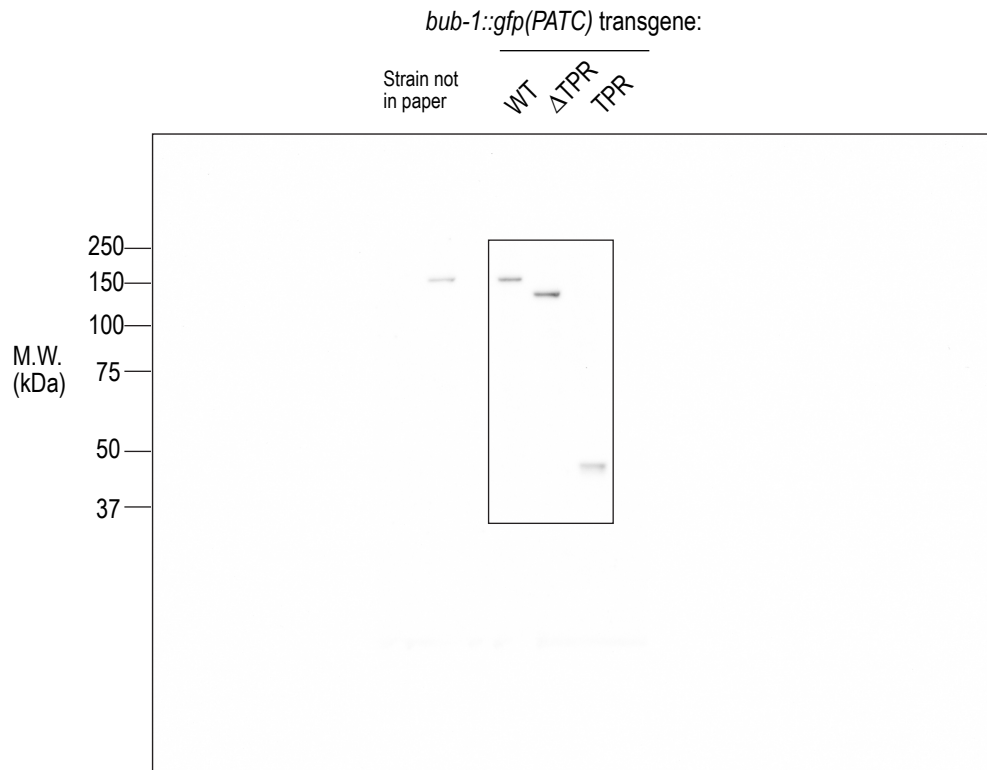

2B: Anti-Tubulin Blot, uncropped, box indicates approximate cropped area, molecular weight markers labeled

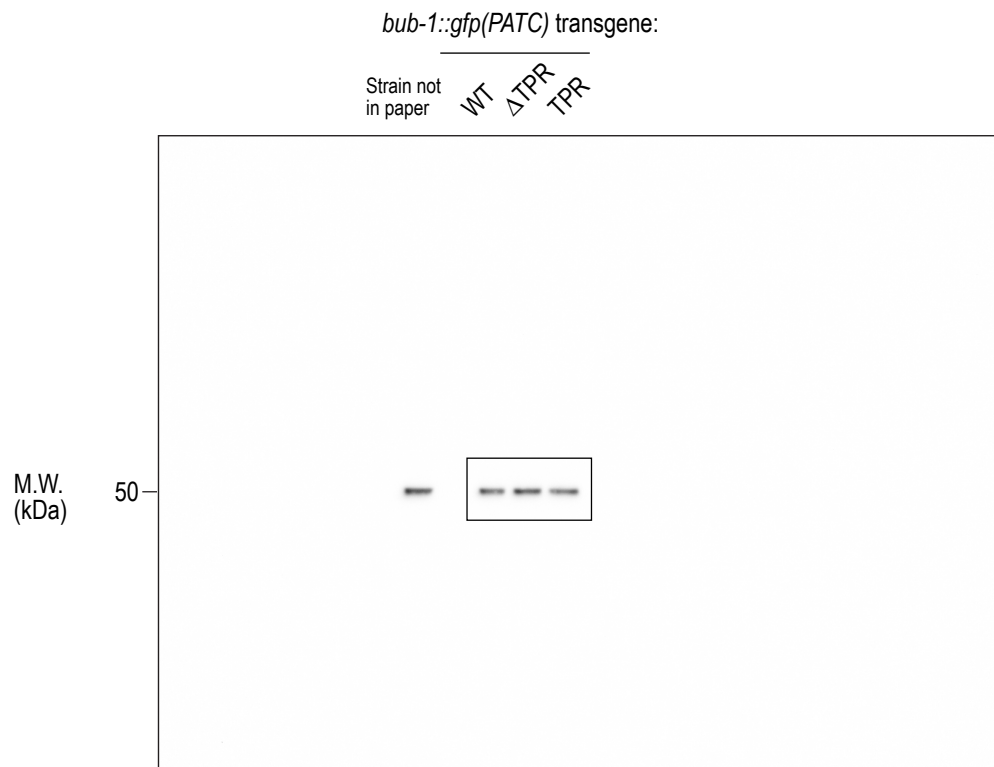

## SourceDataF2

2F: Anti-BUB-1 blot, uncropped, box indicates approximate cropped area, lanes marked, molecular weight markers labeled

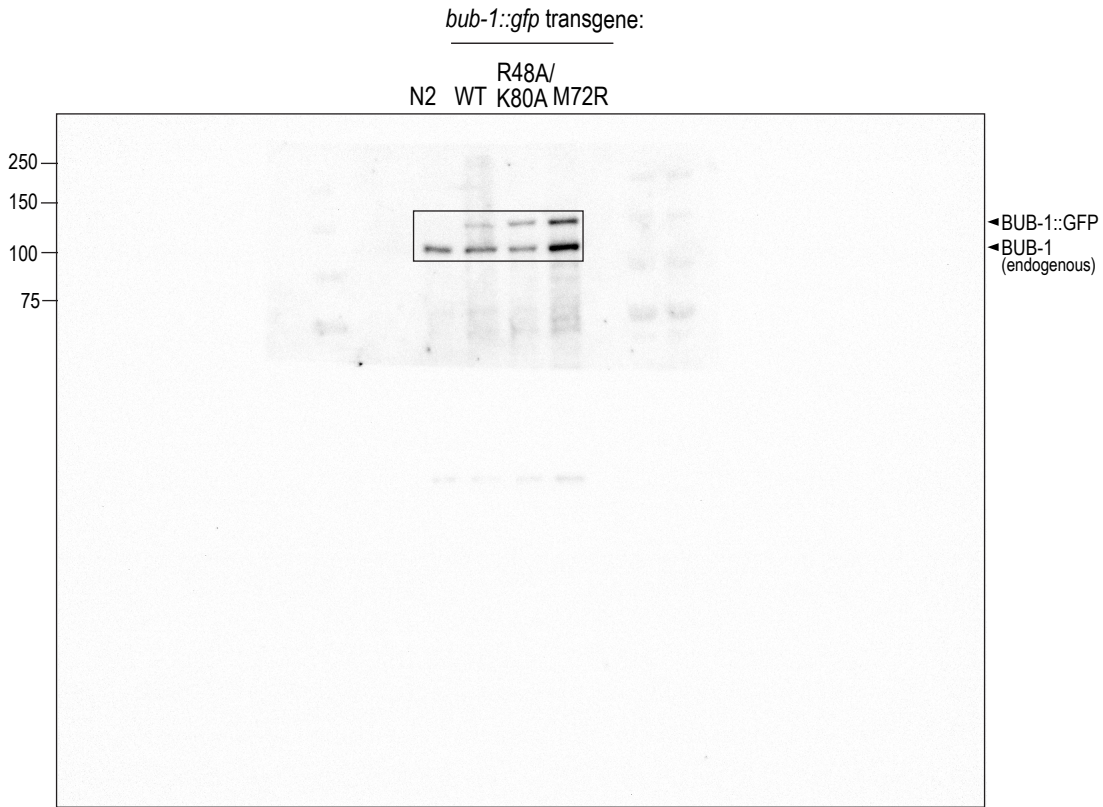

2F: Anti-tubulin blot, uncropped, box indicates approximate cropped area, lanes marked, molecular weight marker labeled

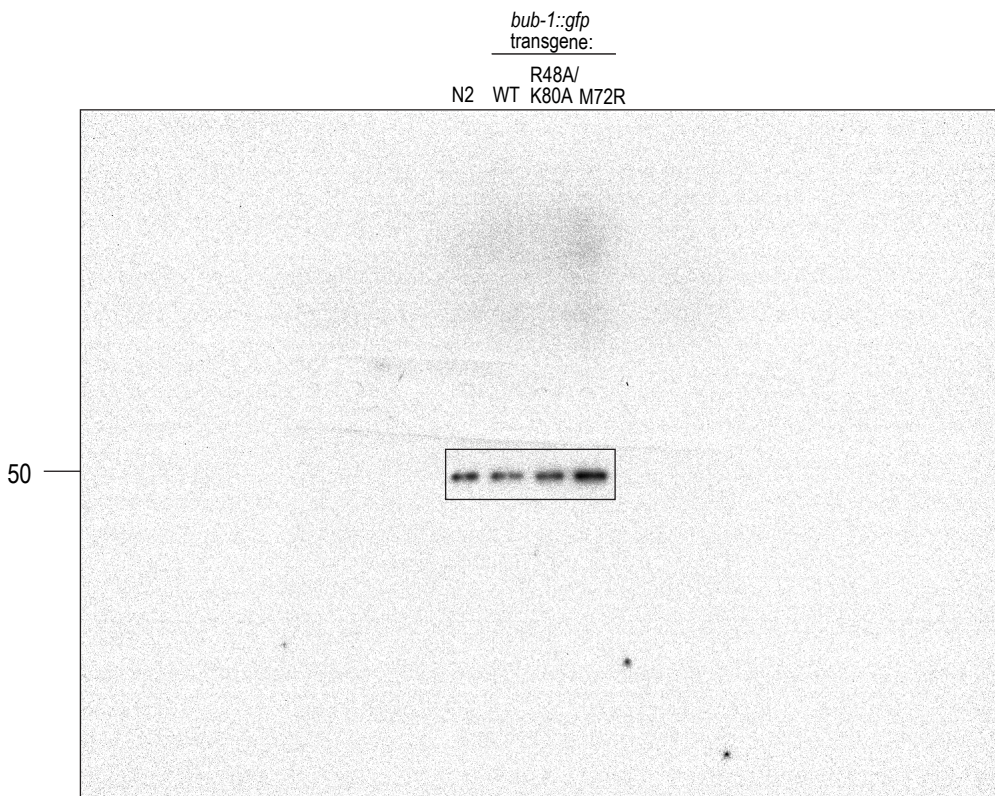

Supplement: JCB_202402036_SourceDataF2.pdf [file JCB_202402036_SourceDataF2.pdf]
