# Supplementary material for: Phospho-KNL-1 recognition by a TPR domain targets the BUB-1–BUB-3 complex to C. elegans kinetochores
Source: PubMed Central journal article supplement — J Cell Biol. 2024 Apr 5;223(7):e202402036. doi: 10.1083/jcb.202402036 (PMC10996584; doi:10.1083/jcb.202402036), 2024-04-05

### SourceDataF3

3F: Bead-bound anti-FLAG blot, uncropped, lanes marked, box indicates approximate cropped area, molecular weight markers indicated

| BUB-1<br>TPR::3xFLAG: | E.V. |   | WT |   | M72R |   | R48A/<br>K80A |   |
|-----------------------|------|---|----|---|------|---|---------------|---|
| PLK-1:                | -    | + | -  | + | -    | + | -             | + |

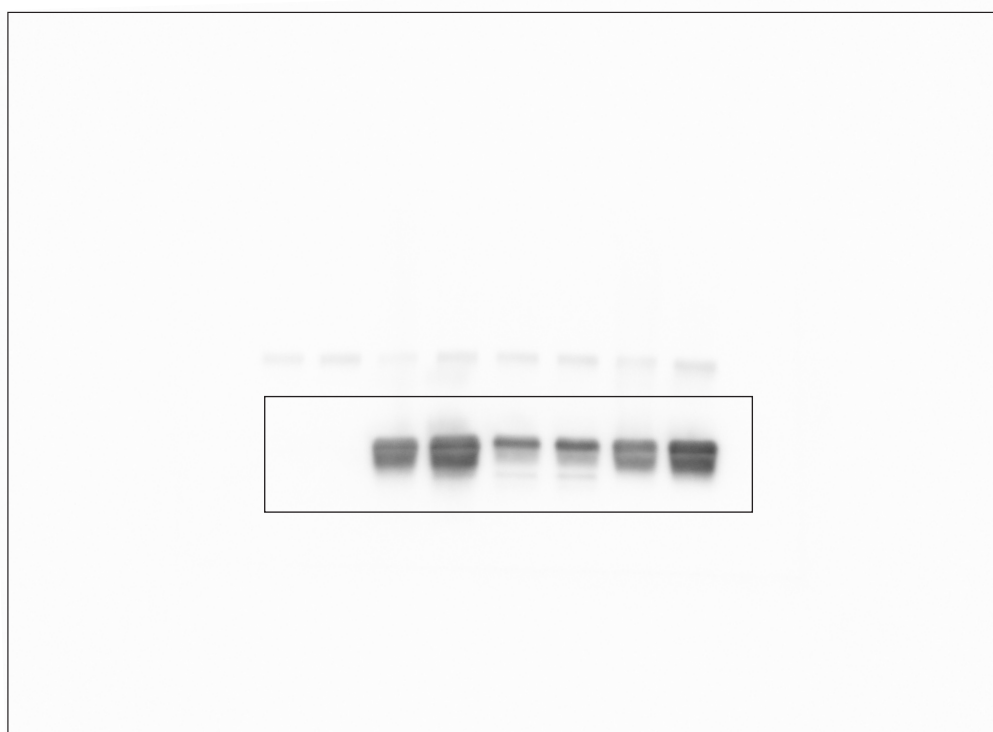

3F: Bead-bound anti-KNL-1 blot, uncropped, lanes marked, box indicates approximate cropped area, molecular weight markers indicated

| BUB-1<br>TPR::3xFLAG: | E.V. |   | WT |   | M72R |   | R48A/<br>K80A |   |
|-----------------------|------|---|----|---|------|---|---------------|---|
| PLK-1:                | -    | + | -  | + | -    | + | -             | + |

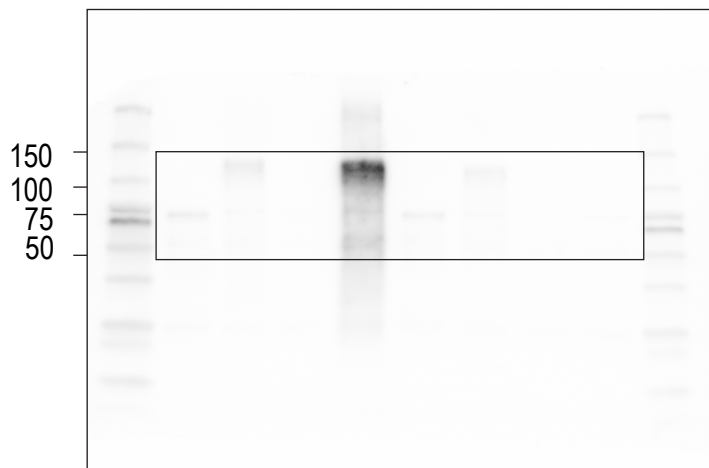

SourceDataF3

3F: Input anti-KNL-1 blot, uncropped, lanes marked, box indicates approximate cropped area, molecular weight markers indicated

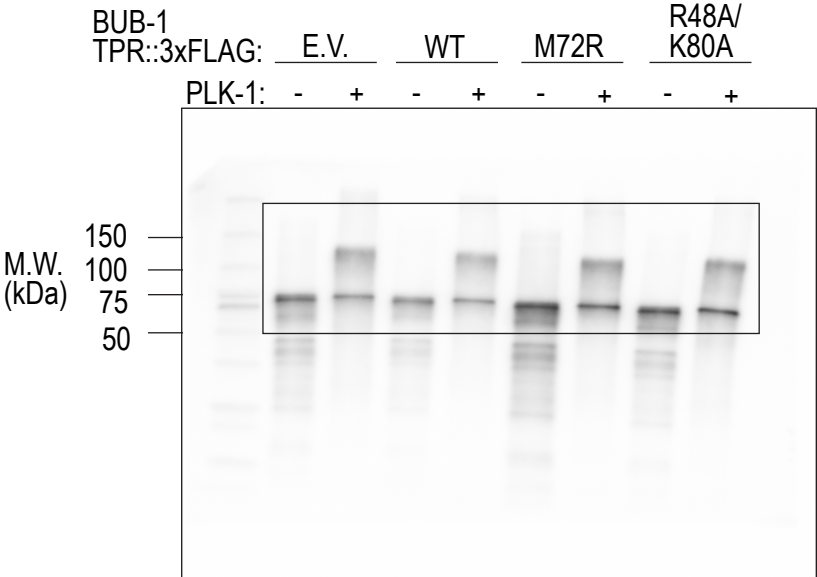

3G: Bead-bound anti-FLAG blot, uncropped, lanes marked, box indicates approximate cropped area, molecular weight markers indicated

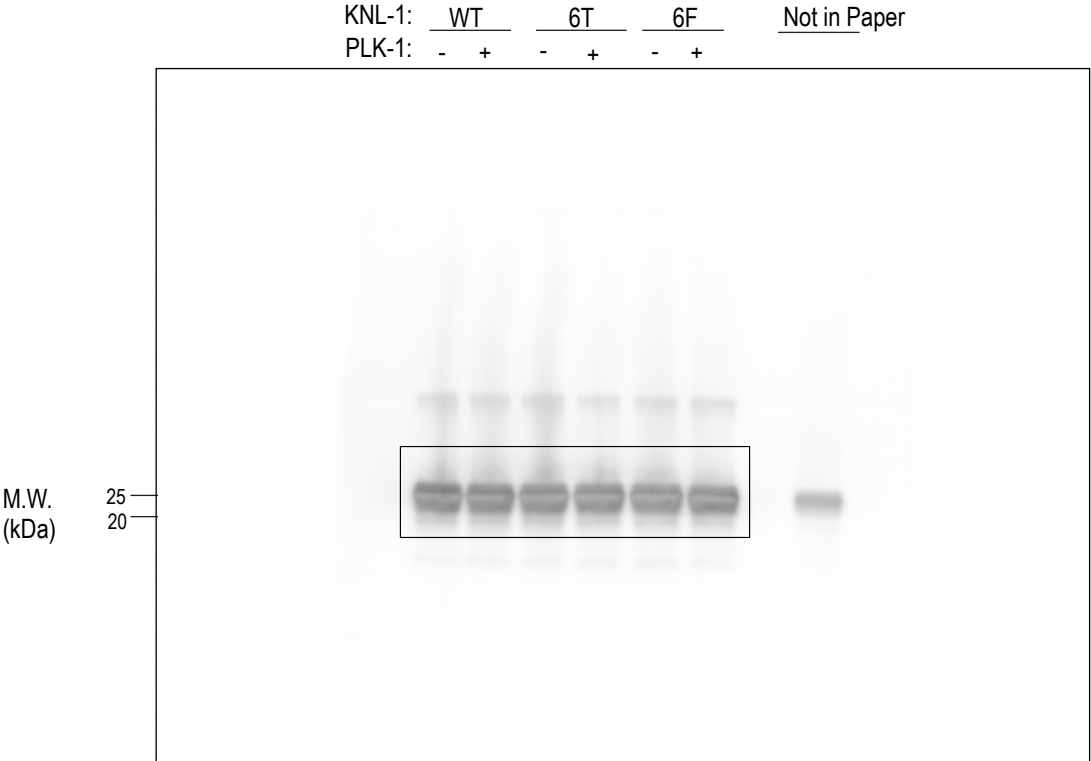

SourceDataF3

3G: Bead-bound anti-KNL-1 blot, uncropped, lanes marked, box indicates approximate cropped area, molecular weight markers indicated

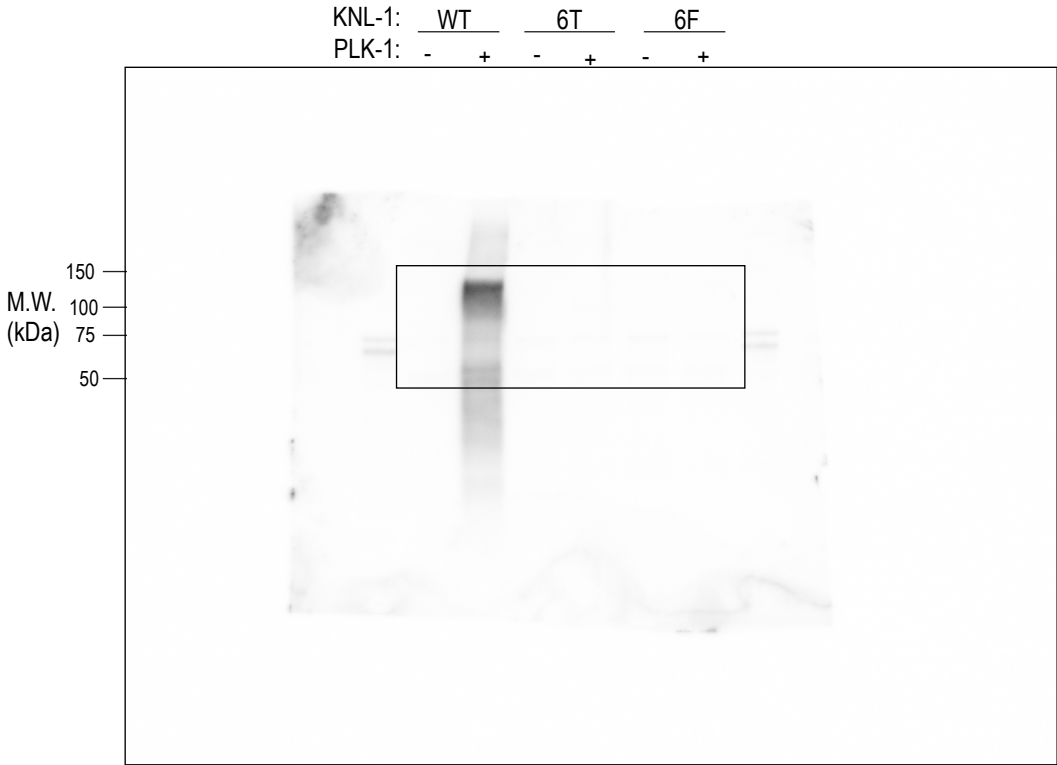

3G: Input anti-KNL-1 blot, uncropped, lanes marked, box indicates approximate cropped area, molecular weight markers indicated

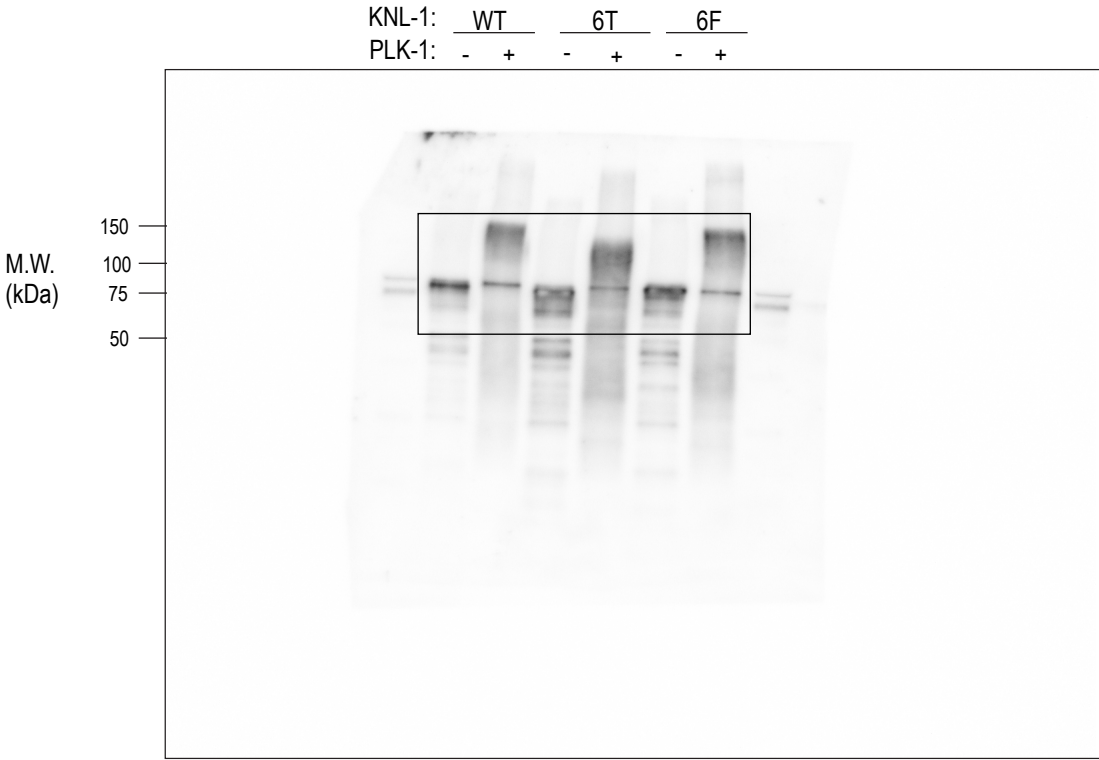

Supplement: JCB_202402036_SourceDataF3.pdf [file JCB_202402036_SourceDataF3.pdf]
