# Supplementary material for: Phospho-KNL-1 recognition by a TPR domain targets the BUB-1–BUB-3 complex to C. elegans kinetochores
Source: PubMed Central journal article supplement — J Cell Biol. 2024 Apr 5;223(7):e202402036. doi: 10.1083/jcb.202402036 (PMC10996584; doi:10.1083/jcb.202402036), 2024-04-05

SourceDataF4

4D: anti-BUB-1 blot, uncropped, lanes indicated, molecular weight markers on side, separate blots are indicated

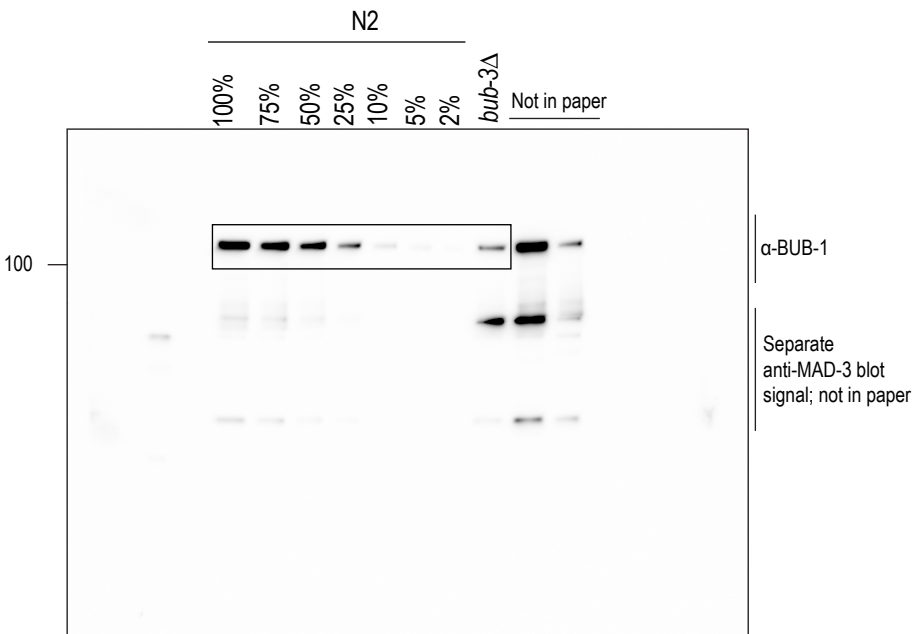

4D: anti-tubulin blot, uncropped, lanes indicated, molecular weight markers on side

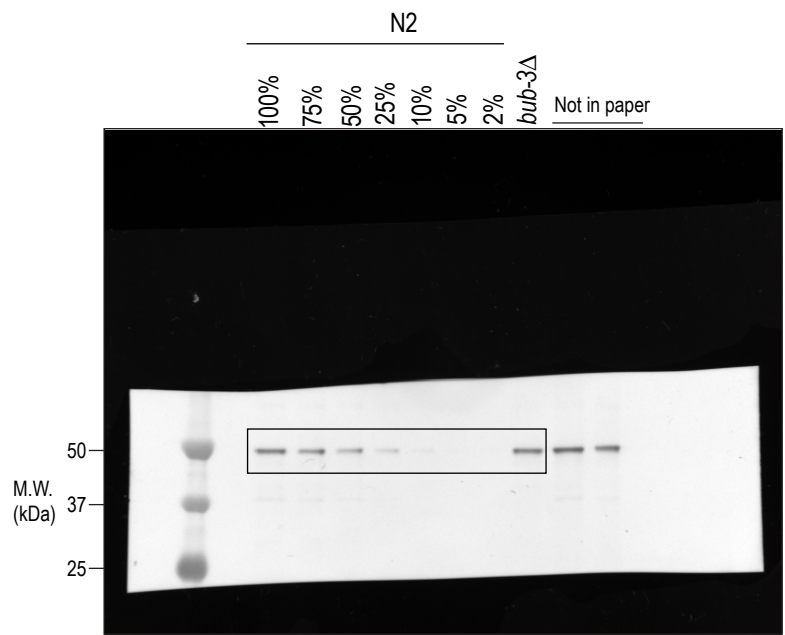

# SourceDataF4

4D: anti-BUB-3 blot, uncropped, lanes indicated, molecular weight markers on side

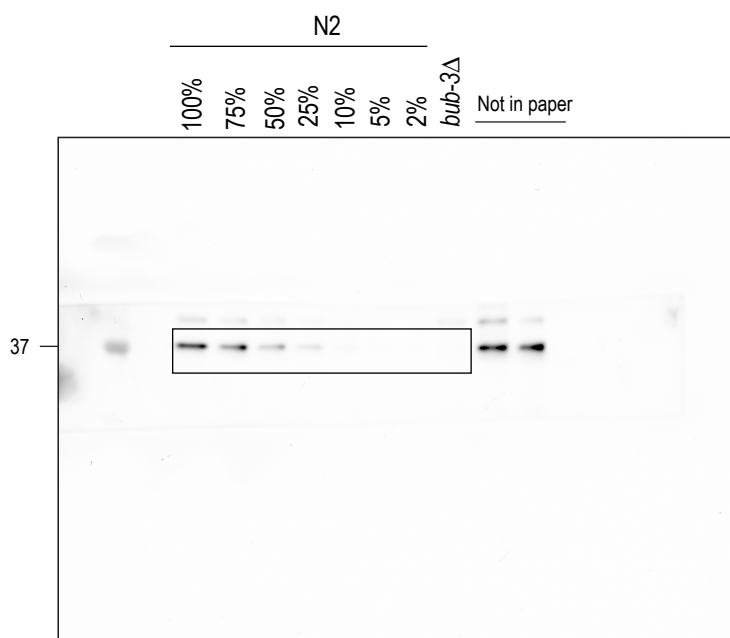

4F: anti-BUB-3 blot, uncropped, lanes indicated, molecular weight markers on side, right half of blot is not in paper

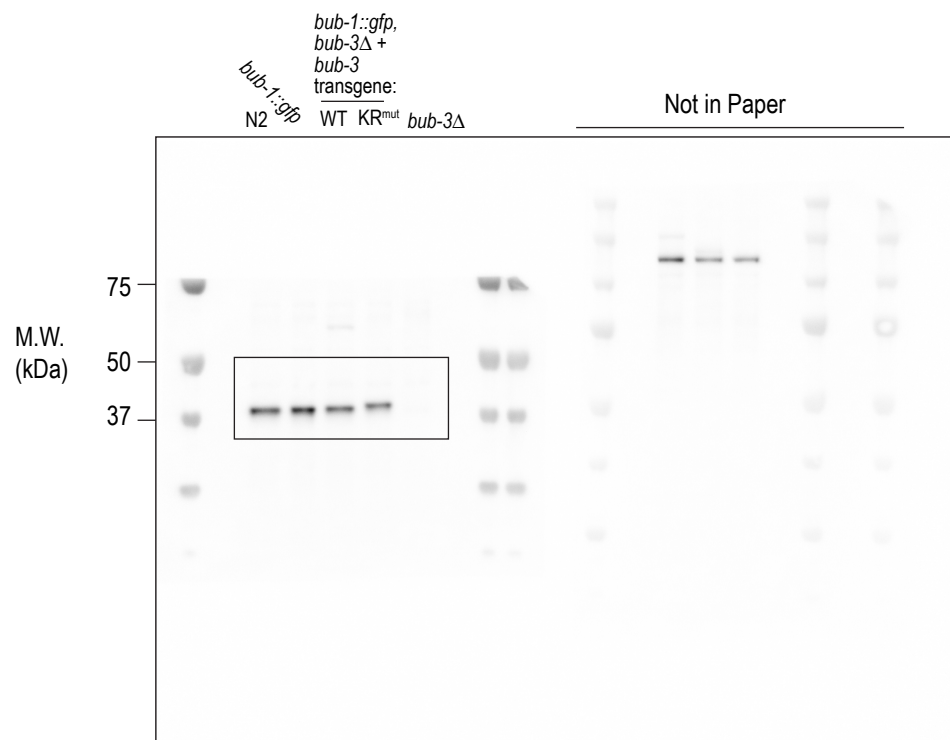

# SourceDataF4

4F: anti-BUB-1 blot, uncropped, lanes indicated, molecular weight markers on side, bottom half of blot is anti-tubulin

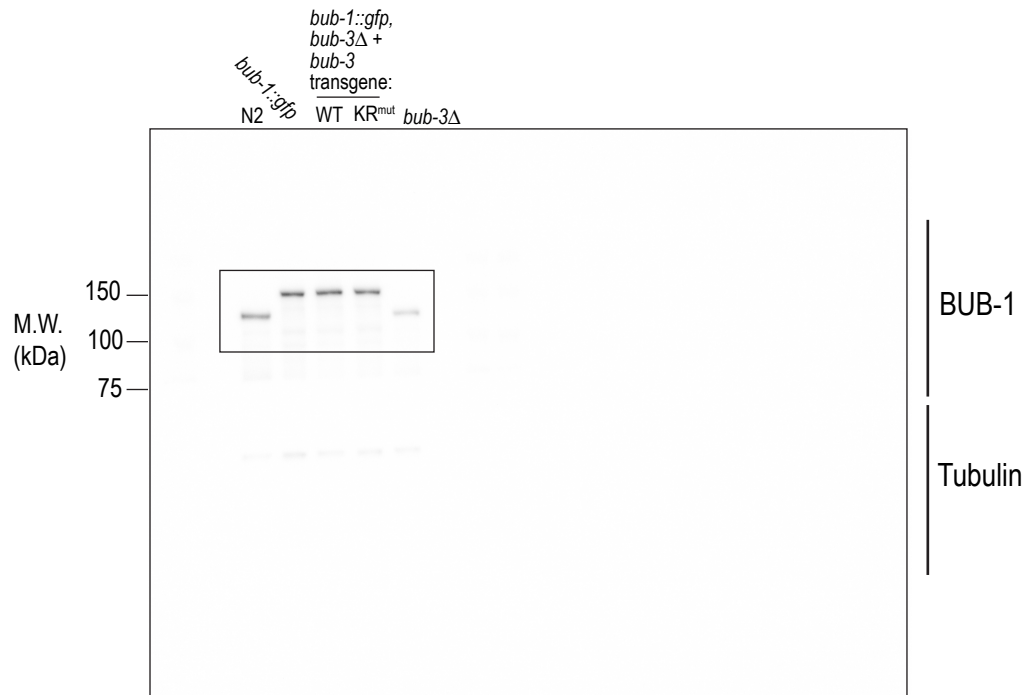

4F: anti-tubulin blot, uncropped, lanes indicated, molecular weight markers on side, top half of blot is anti-BUB-1

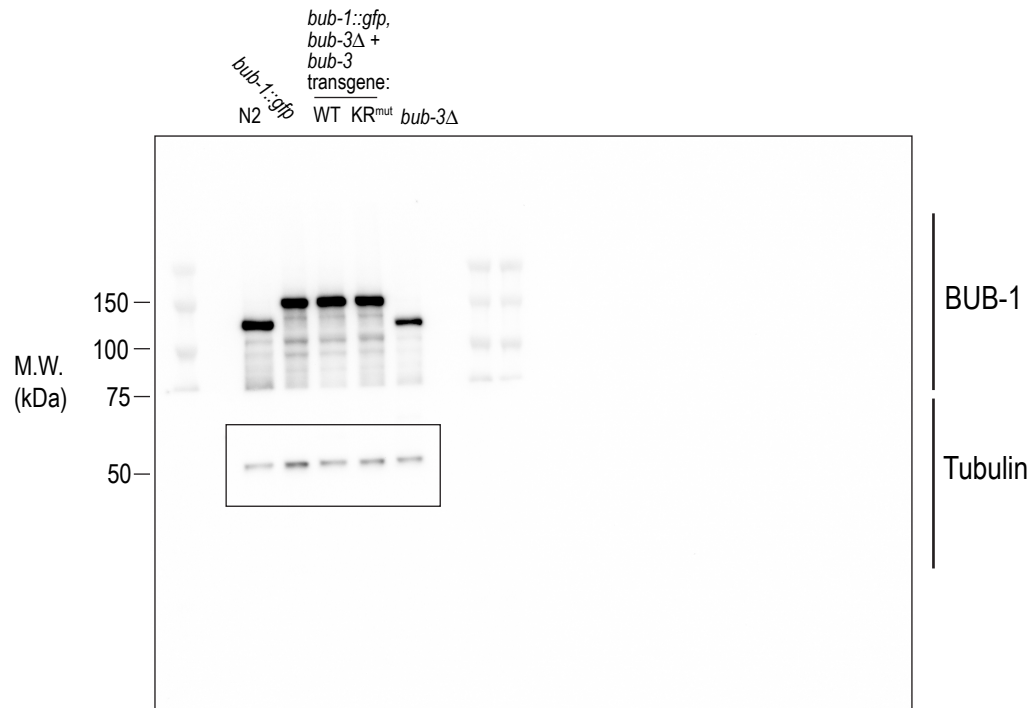

Supplement: JCB_202402036_SourceDataF4.pdf [file JCB_202402036_SourceDataF4.pdf]
